# Supplementary material
Source: PubMed Central journal article supplement (PMC2674620)
Supplement: NIHMS104438-supplement-1_si_001.pdf [file NIHMS104438-supplement-1_si_001.pdf]

# Reduced Sterol-Phospholipid Recognition in Curved Fluid Bilayers

Hideyuki Mitomo, Wen-Hua Chen and Steven L. Regen\*

*Department of Chemistry, Lehigh University, Bethlehem, Pennsylvania  
18015*

## SUPPORTING INFORMATION

**Calibration Curves.** The exchangeable lipid dimers, **AA**, **AB**, and **BB**, were calibrated by HPLC. Varying amounts of exchangeable lipids were mixed with the HPLC mobile phase and injected to HPLC system. Peak areas were then plotted against the amount of lipid that was injected.

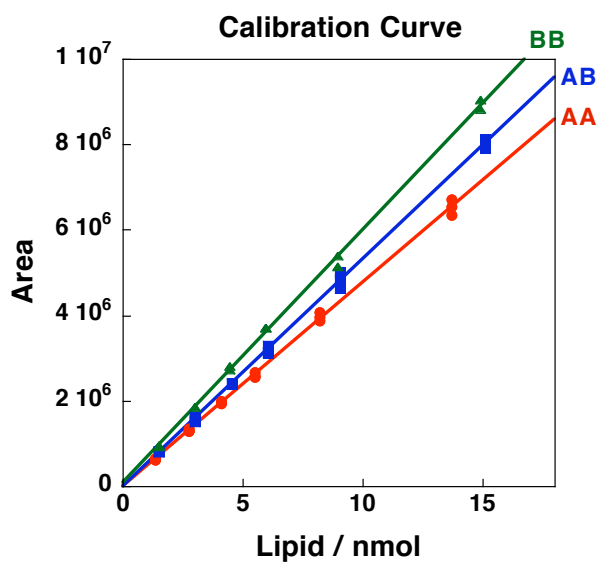

**HPLC Chromatogram.** Typical HPLC chromatograms are shown below. The upper figure shows the chromatogram for the lipids used in cholesterol-poor, 200 nm liposomes. The bottom figure shows the chromatogram for the lipids used in cholesterol-rich 200 nm liposomes. The retention times for dimers of **AA**, **AB** and **BB** were ca. 13 min, 20 min and 36 min, respectively.

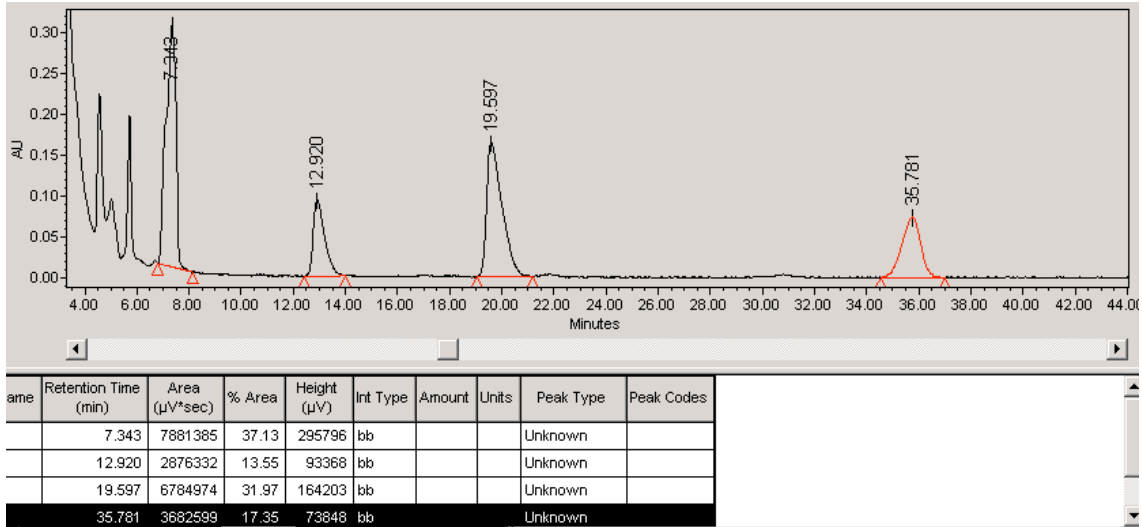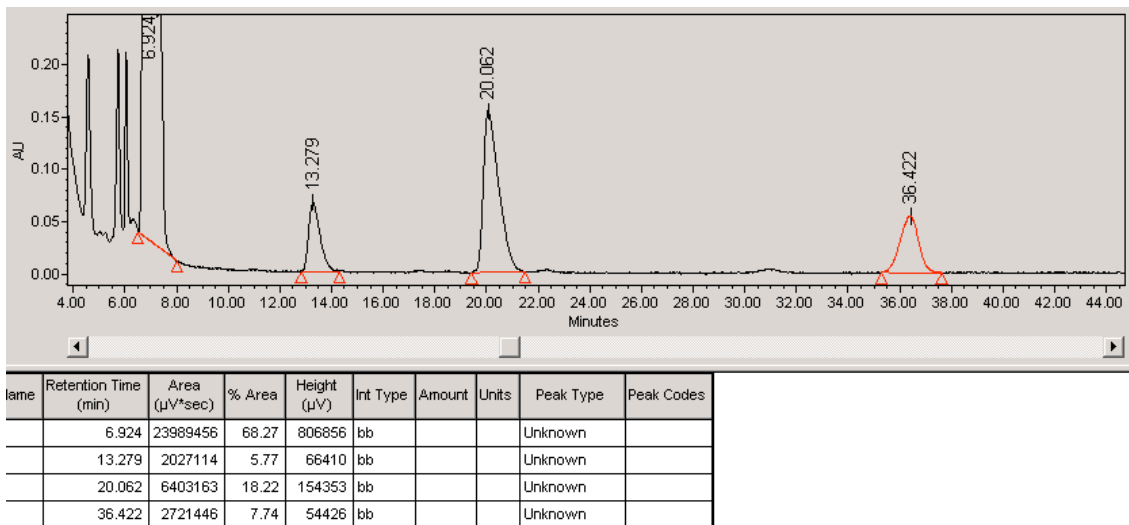

**Values of  $K$ .** The quantity of each dimer was calculated from peak areas from the HPLC chromatograms using calibration curves;  $K$  values were calculated from the following equation:  $K=[AB]^2/([AA] \times [BB])$ .

#### Heterodimer

|                        | 2.5% cholesterol |             | 40% cholesterol |             |
|------------------------|------------------|-------------|-----------------|-------------|
|                        | Size (nm)        | K           | Size (nm)       | K           |
| Reverse-phase          | 1910 ± 1110      | 4.56 ± 0.26 | 4700 ± 2770     | 7.79 ± 0.20 |
| Evaporation methods    | 1630 ± 990       | 4.64 ± 0.10 | 3990 ± 1860     | 7.76 ± 0.15 |
| Extrusion 400nm filter | 288 ± 118        | 4.37 ± 0.11 | 301 ± 132       | 7.59 ± 0.32 |
| 200nm filter           | 183 ± 68         | 4.32 ± 0.03 | 194 ± 68        | 7.37 ± 0.14 |
| 100nm filter           | 104 ± 31         | 4.35 ± 0.06 | 117 ± 30        | 7.05 ± 0.07 |
| 50nm filter            | 65 ± 23          | 4.54 ± 0.12 | 88 ± 34         | 6.35 ± 0.11 |

#### Homodimer

|                        | 2.5% cholesterol |             | 40% cholesterol |             |
|------------------------|------------------|-------------|-----------------|-------------|
|                        | Size (nm)        | K           | Size (nm)       | K           |
| Reverse-phase          | 2610 ± 1020      | 3.65 ± 0.13 | 4330 ± 2470     | 7.29 ± 0.31 |
| Evaporation methods    | 1490 ± 640       | 3.78 ± 0.28 | 3690 ± 2020     | 7.20 ± 0.14 |
| Extrusion 400nm filter | 287 ± 109        | 3.88 ± 0.05 | 325 ± 159       | 7.01 ± 0.19 |
| 200nm filter           | 172 ± 53         | 3.98 ± 0.08 | 200 ± 70        | 6.83 ± 0.23 |
| 100nm filter           | 100 ± 17         | 4.03 ± 0.15 | 121 ± 35        | 6.27 ± 0.22 |
| 50nm filter            | 79 ± 22          | 4.09 ± 0.02 | 103 ± 37        | 5.38 ± 0.33 |

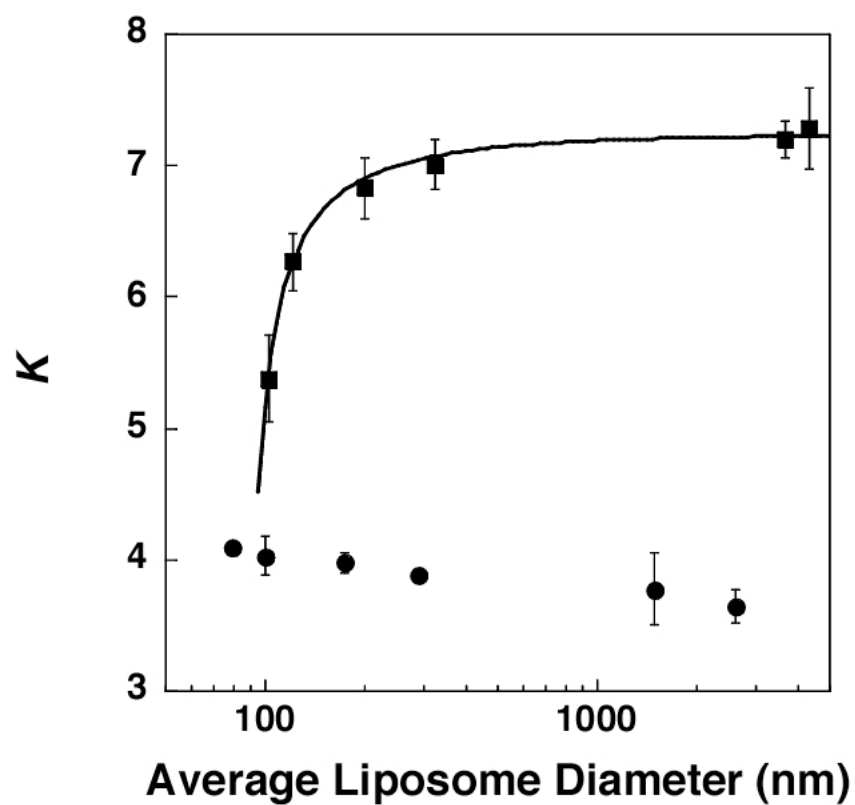

**Figure S1.** Plot of  $K$  versus the average diameter of liposomes that were cholesterol-rich (40 mol%; ■) and cholesterol-poor (2.5 mol%; ●). All liposomes were made using an equimolar mixture of **AA** and **BB** as the source of **A** and **B**; raw data are given in the accompanying tables.

Raw data from NNR experiments; sizes that are indicated were determined before NNR reactions:

| <b>2.5% cholesterol (extruded through 400nm pore filter)</b> |                 |                  |                  |                  |          |
|--------------------------------------------------------------|-----------------|------------------|------------------|------------------|----------|
|                                                              | <b>Time (h)</b> | <b>AA (nmol)</b> | <b>AB (nmol)</b> | <b>BB (nmol)</b> | <b>K</b> |
| from <b>homodimer</b>                                        | 0               | 8.75             | 0                | 11.12            | –        |
|                                                              | 4               | 3.49             | 8.29             | 5.10             | 3.86     |
|                                                              | 4.5             | 3.64             | 8.69             | 5.43             | 3.82     |
|                                                              | 5               | 3.45             | 8.13             | 4.93             | 3.88     |
|                                                              | 5.5             | 3.55             | 8.40             | 5.03             | 3.95     |
|                                                              |                 |                  |                  | average          | 3.88     |
|                                                              |                 |                  | std              | 0.05             |          |
| from <b>heterodimer</b>                                      | 0               | 0                | 25.32            | 0                | –        |
|                                                              | 4               | 5.21             | 11.08            | 5.47             | 4.31     |
|                                                              | 4.5             | 5.25             | 11.05            | 5.26             | 4.42     |
|                                                              | 5               | 5.27             | 11.37            | 5.46             | 4.49     |
|                                                              | 5.5             | 5.15             | 10.87            | 5.40             | 4.25     |
|                                                              |                 |                  |                  | average          | 4.37     |
|                                                              |                 |                  | std              | 0.11             |          |

**2.5% cholesterol (extruded through 200nm pore filter)**

|                         | Time (h) | AA (nmol) | AB (nmol) | BB (nmol) | <i>K</i> |
|-------------------------|----------|-----------|-----------|-----------|----------|
| from <b>homodimer</b>   | 0        | 12.82     | 0         | 12.45     | –        |
|                         | 3.5      | 6.38      | 12.77     | 6.54      | 3.91     |
|                         | 4        | 6.76      | 13.62     | 6.77      | 4.05     |
|                         | 4.5      | 6.48      | 13.10     | 6.55      | 4.04     |
|                         | 5        | 6.47      | 12.89     | 6.56      | 3.92     |
|                         |          |           | average   | 3.98      |          |
|                         |          |           | std       | 0.08      |          |
| from <b>heterodimer</b> | 0        | 0         | 25.03     | 0         | –        |
|                         | 4        | 5.55      | 11.76     | 5.74      | 4.34     |
|                         | 4.5      | 5.65      | 11.87     | 5.82      | 4.28     |
|                         | 5        | 6.02      | 12.72     | 6.22      | 4.32     |
|                         | 5.5      | 5.34      | 11.20     | 5.45      | 4.32     |
|                         |          |           | average   | 4.32      |          |
|                         |          |           | std       | 0.03      |          |

**2.5% cholesterol (extruded through 100nm pore filter)**

|                          | Time (h) | AA (nmol) | AB (nmol) | BB (nmol) | <i>K</i> |
|--------------------------|----------|-----------|-----------|-----------|----------|
| from <b>homo</b> dimer   | 0        | 8.50      | 0         | 11.50     | –        |
|                          | 4        | 3.82      | 9.79      | 6.29      | 3.98     |
|                          | 4.5      | 3.74      | 9.95      | 6.29      | 4.21     |
|                          | 5        | 3.84      | 9.65      | 6.28      | 3.86     |
|                          | 5.5      | 3.98      | 10.18     | 6.40      | 4.07     |
|                          |          |           | average   | 4.03      |          |
|                          |          |           | std       | 0.15      |          |
| from <b>hetero</b> dimer | 0        | 0         | 24.33     | 0         | –        |
|                          | 4        | 5.47      | 11.55     | 5.49      | 4.44     |
|                          | 4.5      | 5.37      | 11.30     | 5.50      | 4.33     |
|                          | 5        | 5.60      | 11.86     | 5.82      | 4.32     |
|                          | 5.5      | 5.63      | 11.72     | 5.64      | 4.33     |
|                          |          |           | average   | 4.35      |          |
|                          |          |           | std       | 0.06      |          |

**2.5% cholesterol (extruded through 50nm pore filter)**

|                          | Time (h) | AA (nmol) | AB (nmol) | BB (nmol) | <i>K</i> |
|--------------------------|----------|-----------|-----------|-----------|----------|
| from <b>homo</b> dimer   | 0        | 11.03     | 0         | 11.11     | –        |
|                          | 3.5      | 5.50      | 11.24     | 5.64      | 4.08     |
|                          | 4        | 5.29      | 10.84     | 5.44      | 4.09     |
|                          | 4.5      | 5.33      | 11.10     | 5.60      | 4.12     |
|                          | 5        | 5.37      | 11.15     | 5.69      | 4.07     |
|                          | 5.5      | 5.23      | 10.76     | 5.41      | 4.10     |
|                          |          |           | average   | 4.09      |          |
|                          |          |           | std       | 0.02      |          |
| from <b>hetero</b> dimer | 0        | 0         | 20.74     | 0         | –        |
|                          | 4        | 4.69      | 10.10     | 4.75      | 4.58     |
|                          | 4.5      | 4.55      | 9.88      | 4.66      | 4.59     |
|                          | 5        | 4.56      | 9.59      | 4.63      | 4.36     |
|                          | 5.5      | 4.45      | 9.69      | 4.57      | 4.62     |
|                          |          |           | average   | 4.54      |          |
|                          |          |           | std       | 0.12      |          |



**40% cholesterol (extruded through 400nm pore filter)**

|                         | Time (h) | AA (nmol) | AB (nmol) | BB (nmol) | <i>K</i> |
|-------------------------|----------|-----------|-----------|-----------|----------|
| from <b>homodimer</b>   | 0        | 9.54      | 0         | 12.15     | –        |
|                         | 4        | 3.22      | 10.50     | 5.05      | 6.77     |
|                         | 4.5      | 3.29      | 10.66     | 4.97      | 6.95     |
|                         | 5        | 3.28      | 10.96     | 5.08      | 7.22     |
|                         | 5.5      | 3.15      | 10.55     | 4.97      | 7.11     |
|                         |          |           | average   | 7.01      |          |
|                         |          |           | std       | 0.19      |          |
| from <b>heterodimer</b> | 0        | 0         | 23.37     | 0         | –        |
|                         | 4        | 4.06      | 11.46     | 4.44      | 7.29     |
|                         | 4.5      | 4.01      | 11.75     | 4.30      | 8.00     |
|                         | 5        | 4.10      | 11.81     | 4.43      | 7.68     |
|                         | 5.5      | 4.07      | 11.72     | 4.57      | 7.39     |
|                         |          |           | average   | 7.59      |          |
|                         |          |           | std       | 0.32      |          |

**40% cholesterol (extruded through 200nm pore filter)**

|                         | Time (h) | AA (nmol) | AB (nmol) | BB (nmol) | K    |
|-------------------------|----------|-----------|-----------|-----------|------|
| from <b>homodimer</b>   | 0        | 8.16      | 0         | 10.53     | –    |
|                         | 4        | 3.15      | 9.98      | 4.80      | 6.60 |
|                         | 4.5      | 3.02      | 9.92      | 4.68      | 6.96 |
|                         | 5.5      | 2.91      | 9.64      | 4.35      | 7.33 |
|                         | 0        | 12.33     | 0         | 12.45     | –    |
|                         | 3.5      | 4.99      | 13.43     | 5.40      | 6.69 |
|                         | 4        | 5.05      | 13.52     | 5.33      | 6.78 |
|                         | 4.5      | 5.03      | 13.52     | 5.35      | 6.79 |
|                         | 5        | 5.05      | 13.55     | 5.42      | 6.72 |
|                         | 5.5      | 4.51      | 11.95     | 4.70      | 6.74 |
|                         |          |           | average   | 6.83      |      |
|                         |          |           | std       | 0.23      |      |
| from <b>heterodimer</b> | 0        | 0         | 23.49     | 0         | –    |
|                         | 3.5      | 4.37      | 12.37     | 4.69      | 7.47 |
|                         | 4        | 4.36      | 12.35     | 4.73      | 7.41 |
|                         | 4.5      | 4.24      | 12.11     | 4.59      | 7.54 |
|                         | 5        | 4.24      | 12.00     | 4.60      | 7.39 |
|                         | 5.5      | 4.14      | 11.70     | 4.39      | 7.53 |
|                         | 0        | 0         | 26.24     | 0         | –    |
|                         | 4        | 5.05      | 13.94     | 5.23      | 7.36 |
|                         | 4.5      | 5.02      | 14.01     | 5.38      | 7.26 |
|                         | 5        | 5.10      | 14.25     | 5.47      | 7.28 |
| 5.5                     | 5.14     | 14.16     | 5.49      | 7.11      |      |
|                         |          |           | average   | 7.37      |      |
|                         |          |           | std       | 0.14      |      |

**40% cholesterol (extruded through 100nm pore filter)**

|                         | Time (h) | AA (nmol) | AB (nmol) | BB (nmol) | <i>K</i> |
|-------------------------|----------|-----------|-----------|-----------|----------|
| from <b>homodimer</b>   | 0        | 10.17     | 0         | 10.78     | –        |
|                         | 4        | 4.47      | 11.61     | 4.91      | 6.13     |
|                         | 4.5      | 4.32      | 11.69     | 4.78      | 6.63     |
|                         | 5        | 4.46      | 11.46     | 4.73      | 6.22     |
|                         | 5.5      | 4.34      | 11.82     | 4.88      | 6.60     |
|                         | 0        | 9.55      | 0         | 13.39     | –        |
|                         | 4        | 3.89      | 12.81     | 6.90      | 6.11     |
|                         | 4.5      | 3.80      | 12.67     | 6.76      | 6.26     |
|                         | 5        | 3.77      | 12.22     | 6.44      | 6.15     |
|                         | 5.5      | 4.05      | 13.18     | 7.09      | 6.05     |
|                         |          |           | average   | 6.27      |          |
|                         |          |           | std       | 0.22      |          |
| from <b>heterodimer</b> | 0        | 0         | 21.98     | 0         | –        |
|                         | 4        | 4.28      | 11.67     | 4.48      | 7.09     |
|                         | 4.5      | 4.30      | 11.81     | 4.53      | 7.17     |
|                         | 5        | 4.47      | 12.26     | 4.73      | 7.11     |
|                         | 5.5      | 4.51      | 12.38     | 4.83      | 7.05     |
|                         | 0        | 0         | 22.91     | 0         | –        |
|                         | 4        | 4.81      | 12.93     | 4.98      | 6.98     |
|                         | 4.5      | 4.94      | 13.27     | 5.08      | 7.02     |
|                         | 5        | 4.73      | 12.88     | 5.03      | 6.97     |
|                         | 5.5      | 4.91      | 13.25     | 5.09      | 7.02     |
|                         |          |           | average   | 7.05      |          |
|                         |          |           | std       | 0.07      |          |

**40% cholesterol (extruded through 50nm pore filter)**

|                         | Time (h) | AA (nmol) | AB (nmol) | BB (nmol) | K    |
|-------------------------|----------|-----------|-----------|-----------|------|
| from <b>homodimer</b>   | 0        | 8.54      | 0         | 11.18     | –    |
|                         | 4        | 3.42      | 9.71      | 5.05      | 5.45 |
|                         | 4.5      | 3.42      | 9.91      | 5.09      | 5.64 |
|                         | 5        | 3.37      | 9.97      | 5.17      | 5.69 |
|                         | 5.5      | 3.44      | 10.05     | 5.12      | 5.74 |
|                         | 0        | 9.21      | 0         | 9.86      | –    |
|                         | 3.5      | 4.45      | 10.38     | 4.90      | 4.95 |
|                         | 4        | 4.57      | 10.45     | 5.01      | 4.77 |
|                         | 4.5      | 4.29      | 10.53     | 4.81      | 5.38 |
|                         | 5        | 4.40      | 10.99     | 5.04      | 5.44 |
|                         | 5.5      | 4.22      | 10.50     | 4.84      | 5.38 |
|                         |          |           |           | average   | 5.38 |
|                         |          |           |           | std       | 0.33 |
| from <b>heterodimer</b> | 0        | 0         | 23.17     | 0         | –    |
|                         | 4        | 4.63      | 12.17     | 4.98      | 6.42 |
|                         | 4.5      | 4.65      | 12.20     | 5.04      | 6.36 |
|                         | 5        | 4.54      | 12.07     | 4.95      | 6.49 |
|                         | 5.5      | 4.75      | 12.19     | 5.01      | 6.25 |
|                         | 0        | 0         | 22.74     | 0         | –    |
|                         | 4        | 4.61      | 12.31     | 5.07      | 6.47 |
|                         | 4.5      | 4.64      | 12.15     | 5.12      | 6.21 |
|                         | 5        | 4.74      | 12.28     | 5.07      | 6.27 |
|                         | 5.5      | 4.79      | 12.50     | 5.17      | 6.31 |
|                         |          |           |           | average   | 6.35 |
|                         |          |           |           | std       | 0.11 |

**2.5% cholesterol (Reverse-phase Extruded Vesicle)**  
**: 1490 nm , 43% error (from DLS)**

|                       | Time (h) | AA (nmol) | AB (nmol) | BB (nmol) | <i>K</i> |
|-----------------------|----------|-----------|-----------|-----------|----------|
| from <b>homodimer</b> | 0        | 8.92      | 0         | 8.32      | –        |
|                       | 4.5      | 3.38      | 6.42      | 3.49      | 3.49     |
|                       | 5        | 3.11      | 6.22      | 3.25      | 3.82     |
|                       | 5.5      | 2.96      | 5.77      | 3.08      | 3.66     |
|                       | 6        | 2.67      | 5.74      | 2.98      | 4.14     |
|                       |          |           |           | average   | 3.78     |
|                       |          |           |           | std       | 0.28     |

**2.5% cholesterol (Reverse-phase Extruded Vesicle)**  
**: 2610 nm , 39% error (from DLS)**

|                       | Time (h) | AA (nmol) | AB (nmol) | BB (nmol) | <i>K</i> |
|-----------------------|----------|-----------|-----------|-----------|----------|
| from <b>homodimer</b> | 0        | 10.91     | 0         | 10.81     | –        |
|                       | 7        | 4.18      | 8.16      | 4.52      | 3.53     |
|                       | 8        | 3.95      | 7.92      | 4.39      | 3.62     |
|                       | 9        | 3.58      | 7.38      | 3.96      | 3.84     |
|                       | 10       | 3.83      | 7.66      | 4.07      | 3.76     |
|                       | 11       | 4.17      | 8.18      | 4.42      | 3.62     |
|                       | 12       | 2.62      | 4.90      | 2.59      | 3.53     |
|                       |          |           |           |           | average  |
|                       |          |           |           | std       | 0.13     |

**40% cholesterol (Reverse-phase Extruded Vesicle)**  
**: 4330 nm , 57% error (from DLS)**

|                       | <b>Time</b><br>(h) | <b>AA</b><br>(nmol) | <b>AB</b><br>(nmol) | <b>BB</b> (nmol) | <b>K</b> |
|-----------------------|--------------------|---------------------|---------------------|------------------|----------|
| from <b>homodimer</b> | 0                  | 11.85               | 0                   | 12.28            | –        |
|                       | 8                  | 3.82                | 10.78               | 4.36             | 6.97     |
|                       | 9                  | 4.02                | 11.48               | 4.56             | 7.20     |
|                       | 10                 | 3.89                | 11.06               | 4.46             | 7.04     |
|                       | 11                 | 3.77                | 11.13               | 4.30             | 7.64     |
|                       | 12                 | 3.54                | 10.44               | 4.06             | 7.59     |
|                       |                    |                     |                     | average          | 7.29     |
|                       |                    |                     |                     | std              | 0.31     |

**40% cholesterol (Reverse-phase Extruded Vesicle)**  
**: 3960 nm , 51% error (from DLS)**

|                       | <b>Time</b><br>(h) | <b>AA</b><br>(nmol) | <b>AB</b><br>(nmol) | <b>BB</b> (nmol) | <b>K</b> |
|-----------------------|--------------------|---------------------|---------------------|------------------|----------|
| from <b>homodimer</b> | 0                  | 12.74               | 0                   | 13.26            | –        |
|                       | 10                 | 4.22                | 11.71               | 4.61             | 7.05     |
|                       | 11                 | 4.57                | 13.19               | 5.34             | 7.13     |
|                       | 12                 | 3.36                | 9.64                | 3.81             | 7.25     |
|                       | 12.1               | 2.23                | 6.60                | 2.65             | 7.37     |
|                       |                    |                     |                     | average          | 7.20     |
|                       |                    |                     |                     | std              | 0.14     |

**2.5% cholesterol (Reverse-phase Extruded Vesicle)  
: 1910 nm , 59% error (from DLS)**

|                  | Time (h) | AA (nmol) | AB (nmol) | BB (nmol) | <i>K</i> |
|------------------|----------|-----------|-----------|-----------|----------|
| from heterodimer | 0        | 0         | 21.07     | 0         | –        |
|                  | 4.5      | 3.86      | 8.46      | 3.92      | 4.72     |
|                  | 5        | 3.87      | 8.38      | 3.85      | 4.72     |
|                  | 5.5      | 3.81      | 8.30      | 3.91      | 4.63     |
|                  | 6        | 3.82      | 7.81      | 3.83      | 4.17     |
|                  |          |           |           | average   | 4.56     |
|                  |          |           |           | std       | 0.26     |

**2.5% cholesterol (Reverse-phase Extruded Vesicle)  
: 1630 nm , 61% error (from DLS)**

|                  | Time (h) | AA (nmol) | AB (nmol) | BB (nmol) | <i>K</i> |
|------------------|----------|-----------|-----------|-----------|----------|
| from heterodimer | 0        | 0         | 20.23     | 0         | –        |
|                  | 8        | 3.24      | 7.22      | 3.45      | 4.66     |
|                  | 9        | 3.24      | 7.31      | 3.47      | 4.74     |
|                  | 10       | 3.09      | 6.98      | 3.35      | 4.71     |
|                  | 11       | 3.03      | 6.81      | 3.34      | 4.58     |
|                  | 12       | 3.05      | 6.85      | 3.42      | 4.50     |
|                  |          |           |           | average   | 4.64     |
|                  |          |           |           | std       | 0.10     |

**40% cholesterol (Reverse-phase Extruded Vesicle)**  
**: 4770 nm , 59% error (from DLS)**

|                         | Time<br>(h) | AA (nmol) | AB (nmol) | BB (nmol) | <i>K</i> |
|-------------------------|-------------|-----------|-----------|-----------|----------|
| from <b>heterodimer</b> | 0           | 0         | 23.33     | 0         | –        |
|                         | 4           | 4.13      | 12.00     | 4.57      | 7.62     |
|                         | 4.5         | 3.97      | 11.82     | 4.35      | 8.10     |
|                         | 5           | 3.94      | 11.33     | 4.27      | 7.63     |
|                         | 5.5         | 3.80      | 10.91     | 4.06      | 7.72     |
|                         | 6           | 3.45      | 10.09     | 3.76      | 7.86     |
|                         |             |           |           | average   | 7.79     |
|                         |             |           |           | std       | 0.20     |

**40% cholesterol (Reverse-phase Extruded Vesicle)**  
**: 3390 nm , 55% error (from DLS)**

|                         | Time<br>(h) | AA (nmol) | AB (nmol) | BB (nmol) | <i>K</i> |
|-------------------------|-------------|-----------|-----------|-----------|----------|
| from <b>heterodimer</b> | 0           | 0         | 23.80     | 0         | –        |
|                         | 8           | 3.55      | 10.39     | 3.83      | 7.94     |
|                         | 9           | 3.48      | 10.24     | 3.93      | 7.68     |
|                         | 10          | 3.57      | 10.51     | 3.99      | 7.75     |
|                         | 11          | 3.34      | 9.70      | 3.74      | 7.52     |
|                         | 12          | 3.22      | 9.47      | 3.55      | 7.85     |
|                         | 12.1        | 2.92      | 8.63      | 3.28      | 7.79     |
|                         |             |           |           | average   | 7.76     |
|                         |             |           |           | std       | 0.15     |



**50% cholesterol (from pure hetero dimer)**

**extruded through 200nm pore filter : 178 nm , 23% error (from DLS)**

| Time (h) | AA (nmol) | AB (nmol) | BB (nmol) | <i>K</i> |
|----------|-----------|-----------|-----------|----------|
| 0        | 0         | 20.43     | 0         | –        |
| 4        | 4.43      | 12.74     | 4.34      | 8.44     |
| 4.5      | 4.34      | 12.43     | 4.31      | 8.25     |
| 5        | 4.51      | 12.79     | 4.51      | 8.04     |
| 5.5      | 4.18      | 11.89     | 4.12      | 8.22     |
| 0        | 0         | 24.10     | 0         | –        |
| 4        | 5.19      | 14.41     | 4.89      | 8.17     |
| 4.5      | 5.07      | 14.23     | 4.76      | 8.38     |
| 5        | 5.23      | 14.21     | 4.82      | 8.02     |

average 8.22

std 0.16

**50% cholesterol (from pure hetero dimer)**

**extruded through 50nm pore filter : 85 nm , 40% error (from DLS)**

| Time (h) | AA (nmol) | AB (nmol) | BB (nmol) | <i>K</i> |
|----------|-----------|-----------|-----------|----------|
| 0        | 0         | 18.54     | 0         | –        |
| 4        | 3.99      | 11.07     | 4.02      | 7.63     |
| 4.5      | 4.19      | 11.09     | 4.21      | 6.97     |
| 5        | 3.91      | 10.68     | 3.96      | 7.37     |
| 5.5      | 4.18      | 11.12     | 4.05      | 7.30     |
| 0        | 0         | 18.93     | 0         | –        |
| 4        | 4.46      | 11.40     | 4.02      | 7.25     |
| 4.5      | 4.41      | 11.34     | 3.97      | 7.34     |
| 5        | 4.34      | 11.38     | 3.99      | 7.46     |
| 5.5      | 4.50      | 11.33     | 3.98      | 7.17     |

average 7.31

std 0.20
